# Size-dependent patterns of cell proliferation and migration in freely-expanding epithelia

Matthew A. Heinrich<sup>a</sup>, Ricard Alert<sup>b,c</sup>, Julianne M. LaChance<sup>a</sup>, Tom J. Zajdel<sup>a</sup>, Andrej Košmrlj<sup>a,d</sup>, and Daniel J. Cohen<sup>a,1</sup>

<sup>a</sup>Department of Mechanical and Aerospace Engineering, Princeton University, Princeton, NJ 08544, USA

<sup>b</sup>Lewis-Sigler Institute for Integrative Genomics, Princeton University, Princeton, New Jersey 08544, USA

<sup>c</sup>Princeton Center for Theoretical Science, Princeton University, Princeton, New Jersey 08544, USA

<sup>d</sup>Princeton Institute for the Science and Technology of Materials (PRISM), Princeton University, Princeton, New Jersey 08544, USA

**The coordination of cell proliferation and migration in growing tissues is crucial in development and regeneration but remains poorly understood. Here, we find that, while expanding with an edge speed independent of initial conditions, millimeter-scale epithelial monolayers exhibit internal patterns of proliferation and migration that depend not on the current but on the initial tissue size, indicating memory effects. Specifically, the core of large tissues becomes very dense, almost quiescent, and ceases cell-cycle progression. In contrast, initially-smaller tissues develop a local minimum of cell density and a tissue-spanning vortex. To explain vortex formation, we propose an active polar fluid model with a feedback between cell polarization and tissue flow. Taken together, our findings suggest that expanding epithelia decouple their internal and edge regions, which enables robust expansion dynamics despite the presence of size- and history-dependent patterns in the tissue interior.**

tissue expansion | cell cycle | collective cell migration | epithelia | active polar fluids

Correspondence: [danielcohen@princeton.edu](mailto:danielcohen@princeton.edu)

## Introduction

Writing in 1859, physiologist Rudolf Virchow presented the concept of the ‘Zellenstaat’ or ‘Cell State,’ describing tissues as “a society of cells, a tiny well-ordered state” (1). This social framework motivated Abercrombie and Heaysman’s 1954 work on cellular behavior that elucidated how encounters between cells can regulate locomotion and proliferation via contact inhibition (2). Since then, concerted interdisciplinary effort has been brought to bear on understanding how cell-cell interactions give rise to the complex collective behaviors driving so many crucial biological processes. One of the most foundational collective behaviors is collective cell migration—the directed, coordinated motion of cellular ensembles that enables phenomena such as gastrulation, wound healing, and tumor invasion (3). Given this importance, considerable effort spanning biology, engineering, and physics has been directed towards understanding how local cellular interactions can give rise to globally coordinated motions (4, 5).

Studies of collective cell migration are most often performed using epithelial tissues due to their fundamental role in multicellular organisms and strong cell-cell adhesion, which in turn gives rise to elegant, cohesive motion. Moreover, given that epithelia naturally form surfaces in vivo, studying epithelial layers in vitro has a physiological basis that can inform our understanding of processes such as healing (6), envelop-

ment (7), and boundary formation (8). These features have made epithelia both the gold standard in collective cell migration studies, and one of the most well-studied models for biological collective behaviors.

Due to the complexity of collective behaviors, much effort has gone towards reductionist assays that restrict degrees of freedom and ensemble size to simplify analysis and interpretation. One such approach is to confine a tissue within pre-defined boundaries using micropatterning to create adhesive and non-adhesive regions (9–14). Such confinement mimics certain in vivo contexts such as constrained tumors as well as aspects of compartmentalization during morphogenesis (15). Alternately, many studies have explored the expansion of tissues that initially grow into confluence within confinement but are later allowed to migrate into free space upon removal of a barrier. A popular assay of this type relies on rectangular strips of tissue that are allowed to expand in one or both directions (6, 16–23), where averaging along the length of the strip can reveal coordinated population-level behaviors such as complex migration patterns, non-uniform traction force fields, and traveling mechanical waves. Other studies have focused on the isotropic expansion of micro-scale (< 500  $\mu\text{m}$  diameter) circular tissues using the barrier stencil technique (24) as well as photoswitchable substrates (25). Still more work has explored approaches to induce directional migration, from geometric cues to applied electric fields (26, 27).

In contrast to micro-scale confinement assays, other work has focused on large, freely-expanding tissues of uncontrolled initial size and shape, which grow from either single cells (28, 29) or cell-containing droplets (30, 31). Related experiments track long-term growth of cell colonies via images taken once per day over several days, but this low temporal resolution cannot access timescales over which migration is important (29, 32). Thus, there is still a lack of assays to study long-term expansion and growth of large-scale tissues with precisely-controlled initial conditions, especially initial tissue size, shape, and density.

To address this gap, we leveraged bench-top tissue patterning (6, 33) to precisely pattern macro-scale circular epithelia of two sizes (>1 mm in diameter) and performed long-term, high frequency, time-lapse imaging after release of a barrier. To elucidate the consequences of size effects on the tissue, we tracked every cell, relating the overall expansion kinetics to cell migration speed, cell density, and cell-cycle dynamics. We find that, whereas the tissue edge dynamics

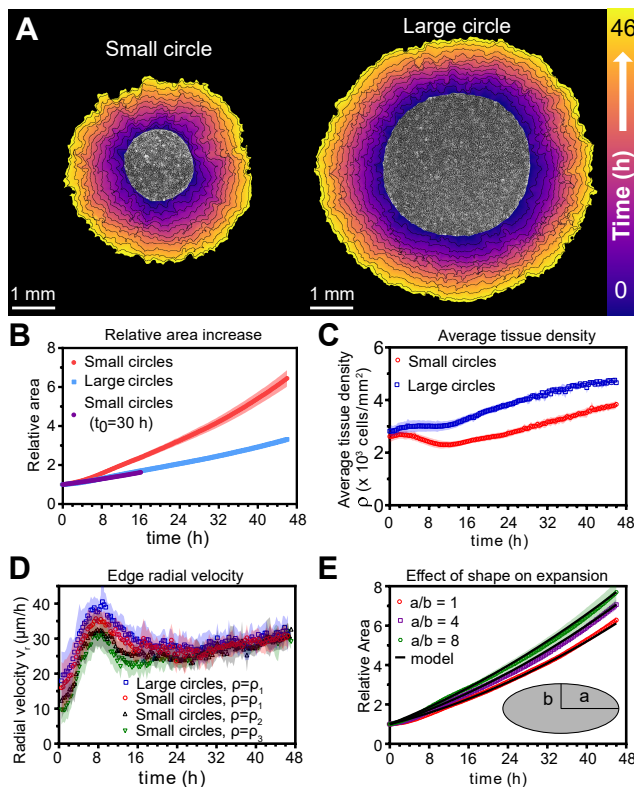

**Fig. 1.** Expansion dynamics of millimeter-size cell monolayers. (A) Footprint throughout 46 h growth period of representative small (left) and large (right) circular tissues, with the tissue outlines drawn at 4 h increments. Initial diameters were 1.7 mm and 3.4 mm. (B) Small circles exhibit faster relative area,  $A(t)/A_0$ , increase than large circles, where  $A_0$  and  $A(t)$  are the areas of tissues at the beginning of the experiment and at time  $t$ , respectively. Purple points show the relative area increase,  $A(t+t_0)/A(t_0)$ , of small tissues from the time  $t_0 = 30$  h when they reached the size of the large circles. (C) Average tissue density  $\rho(t) = N(t)/A(t)$  has non-monotonic evolution in small tissues but monotonically increases in large tissues, where  $N(t)$  is the number of cells in a tissue at time  $t$ . (D) Edge radial velocity  $v_r$  is largely independent of initial tissue size and cell density. We grouped initial cell densities as  $\rho_1 = [2350, 3050]$  cells/mm<sup>2</sup>,  $\rho_2 = [1650, 2350]$  cells/mm<sup>2</sup>, and  $\rho_3 = [1300, 1650]$  cells/mm<sup>2</sup>. (E) Experimental data on tissue shape and model fits. Assuming a constant migration speed  $v_n$  in direction normal to the edge, we can predict the area expansion dynamics of elliptical tissues with different aspect ratios. Fitting the model to our data for all tissues gives  $v_n = 29.5$  μm/h. In B, data are from  $n=16$  tissues across 5 independent experiments (small and large circles). In C,  $n=11$  across 4 experiments for small circles, and  $n=9$  across 3 experiments for large circles. In D,  $n=16$  across 5 independent experiments for small and large circles,  $\rho = \rho_1$ ;  $n=13$  across 3 experiments for small circles,  $\rho = \rho_2$ ; and  $n=11$  across 3 experiments for small circles,  $\rho = \rho_3$ . In E,  $n=4$  across 2 experiments for  $a/b=1$  and  $a/b=4$ , and  $n=5$  across 2 experiments for  $a/b=8$ . Shaded regions correspond to standard deviations.

is independent of the initial conditions, the tissue bulk exhibits size-dependent patterns of cell proliferation and migration, including large-scale vortices accompanied by dynamic density profiles. Together, these data comprise the first comprehensive study of macro-scale, long-term epithelial expansion, and our findings demonstrate the importance of exploring collective cell migration across a wider range of contexts, scales, and constraints.

## Results

**Expansion of millimeter-scale epithelia of different sizes and shapes.** We began by characterizing the overall expansion and growth of tissues with the same cell density

but different initial diameters of 1.7 mm and 3.4 mm (a 4X difference in area, with tissues hereafter referred to as either “small” or “large”), using an MDCK cell line stably expressing the 2-color FUCCI cell-cycle marker (22, 31, 34–36). We patterned the tissues by culturing cells in small and large circular silicone stencils for ~18 hrs (6, 33), whereupon stencils were removed and tissues were allowed to freely expand for 46 h (Fig. 1A, Movie S1), while images were collected at 20 minute intervals using automated microscopy (see SI Supplementary Methods). Our cell seeding conditions and incubation period were deliberately tuned to ensure that the stencils did not induce contact inhibition or jamming prior to stencil removal. Upon stencil removal, tissues expanded while maintaining their overall circular shape throughout the 2-day experiment. Unless otherwise noted, cell density at stencil removal was ~2700 cells/mm<sup>2</sup>, a value consistent with active and growing confluent MDCK epithelia (22, 35).

First, we measured relative areal increase (Fig. 1B) and relative cell number increase (SI Appendix, Fig. S1) of small and large tissues. By 46 h, small and large tissues had increased in area by 6.4X and 3.3X, respectively, while cell number increased by 9.2X and 5.5X, respectively (Fig. S1). Since proliferation outpaces area expansion in long-term growth, average tissue density increased by the end of the experiment. The evolution of average tissue density was more complex, however, as small tissues experienced a density decrease from 4–12 h while large tissues exhibited a monotonic increase in cell density (Fig. 1C). Accordingly, at any given time after stencil removal, large tissues had a higher density than small tissues. Non-monotonic density evolution has been observed in thin epithelial strips (6) and likely arises from competition between migration and proliferation dynamics, which we discuss later.

We then related area expansion to the kinematics of the tissue edge. To quantify edge motion, we calculated the average radial velocity of the tissue boundary,  $v_r(t)$ , at 1 hr intervals over 46 hrs (SI Supplementary Methods). We found that  $v_r$  is independent of both tissue size and a wide range of initial cell densities, in all cases reaching ~30 μm/h after ~16 h (Fig. 1D). Before reaching this constant edge velocity,  $v_r$  ramps up during the first 8 h after stencil removal, and, notably, overshoots its long-time value by almost 30%. We hypothesize that the overshoot is due to the formation of fast multicellular finger-like protrusions that emerge at the tissue edge in the early stages of expansion and then diminish (Movie S2). This hypothesis is supported by a recent model showing that edge acceleration (as observed during the first 8 h in Fig. 1D) leads to finger formation (37). It is remarkable that the edge radial velocity  $v_r(t)$  is independent of the initial tissue size and density, especially considering that cell density evolution shows opposite trends at early stages of expansion for small and large tissues (Fig. 1C). This observation suggests that the early stages of epithelial expansion are primarily driven by cell migration rather than proliferation or density-dependent decompression and cell spreading.

The observation that  $v_r$  is independent of tissue size ought to explain why small tissues have faster area expansions than

large tissues. We hypothesized that the relation between tissue size and areal increase could be attributed primarily to the perimeter-to-area ratio. Assuming a constant edge velocity  $v_n$  normal to the tissue boundary, the tissue area increases as  $dA = P v_n dt$ , where  $P$  is the perimeter of tissue and  $dt$  is a small time interval. Thus, the relative area increase  $dA/A = (P/A) v_n dt$  scales as the perimeter-to-area ratio, which is inversely proportional to the radius for circular tissues, so the relative area increases faster for smaller tissues (Fig. 1B). In order to verify that the perimeter-to-area ratio is proportional to the relative area increase, we analyzed elliptical tissues with the same area and tissue density but different perimeters (Movie S3). Increasing the perimeter-to-area ratio of a tissue by increasing its aspect ratio indeed leads to faster areal expansion (Fig. 1E). A simple, edge-driven expansion model with linear increase of the tissue major and minor axes predicts  $A(t)/A(0) = (a + v_n t)(b + v_n t)/(ab)$ , where  $a$  and  $b$  are the initial major and minor axes of the tissue. This model fits our data well assuming the same edge speed  $v_n \simeq 29.5 \mu\text{m/h}$  for all tissues (Fig. 1E). Together, our findings demonstrate that epithelial shape and size determine area expansion dynamics via the perimeter-to-area ratio. This relationship results from the fact that tissues exhibit a constant, size-independent, migration-driven edge speed normal to tissue boundary. Since initial tissue size does not affect boundary dynamics, but does impact the relative growth and expansion of the tissue, we hypothesize that cells in the tissue bulk exhibit tissue size-dependent behaviors.

**Spatiotemporal dynamics of migration speed and radial velocity.** Having demonstrated the role of the boundary in the expansion of large-scale epithelia, we sought to relate tissue areal expansion rate to internal collective cell migration dynamics. We used Particle-Image-Velocimetry (PIV, See SI Appendix) to obtain flow fields describing cell migration within freely expanding epithelia (6, 17, 27, 38, 39). We constructed kymographs (SI Supplementary Methods) to display the full spatiotemporal flow patterns of the tissue (Fig. 2A, B) (20, 21), averaging over the angular direction and over 16 tissues (for representative kymographs, see SI Appendix, Fig. S2). We also separately show time evolution (Fig. 2C) and spatial profiles (Fig. 2D) of speed and radial velocity to compare small and large tissues.

Kymographs of speed and radial velocity reveal the existence of an edge region of fast, outward, radial cell motion (Fig. 2A, B), with speeds similar to the radial edge velocity reported in Fig. 1D. Up to  $\sim 500 \mu\text{m}$  from the tissue edge, the speed and radial velocity profiles are practically identical for small and large tissues (Fig. 2D), showing that cell motion near the tissue edge is independent of tissue size.

The tissue centers, in contrast, exhibit size-dependent behaviors. For both small and large tissues, a wave front of cell speed and radial velocity propagates toward the tissue centers at  $\sim 90 \mu\text{m/h}$  (Fig. 2A and B, dashed lines). This is approximately 3X faster than the tissue edge speed, consistent with previously described waves of strain rate in cell monolayers (20). Soon after the wave of radial velocity reaches the center, it retreats, leaving a region of low radial velocity that in-

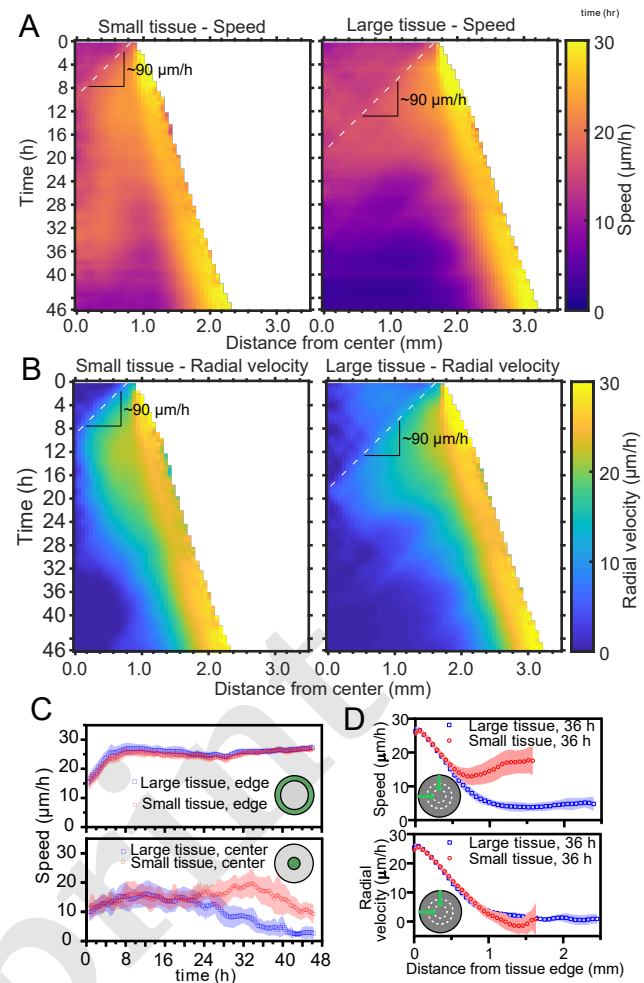

**Fig. 2.** Speed and radial velocity in inner and outer tissue zones. (A,B) Average kymographs of (A) speed and (B) radial velocity  $v_r$  throughout expansion for small (left) and large (right) tissues. (C) Evolution of the average speed of center (top) and boundary (bottom) zones, defined as regions extending  $\sim 200 \mu\text{m}$  from the tissue center and tissue edge, respectively. The width of the zones corresponds roughly to the velocity-velocity correlation length for MDCK cells (17). While the speed in the edge zone remains high in both small and large tissues, the speed in the center zone begins to decrease  $\sim 24$  h sooner in large tissues than in small tissues, as the central zone of the small tissues has particularly high speed from 18–36 h. (D) Profiles of speed (top) and radial velocity (bottom) at 36 h, from the edge of the tissue inwards. Arrows indicate that the tissues are indexed from the edge of the tissue inwards.

creases in extent in the center of both small and large tissues (Fig. 2B). This decrease of radial velocity is accompanied by a reduction in cell speed in the center of large tissues but not in small tissues, in which cell speed remains high until 36 h (Fig. 2A, 2C Bottom). We examine the behavior of this high-speed but low-radial-velocity central region of small tissues in the next section.

**Emergence of large-scale vortices.** The propagation of low radial velocity out from the center of small tissues coincides with the formation and expansion of a millimeter-scale, persistent vortex (see Fig. 3A, Movie S4 for representative vortex). These large vortices are observed in both small and large tissues (Movie S5), but they only reach tissue-spanning sizes in small tissues.

To visualize the form and scale of these vortices, we tracked



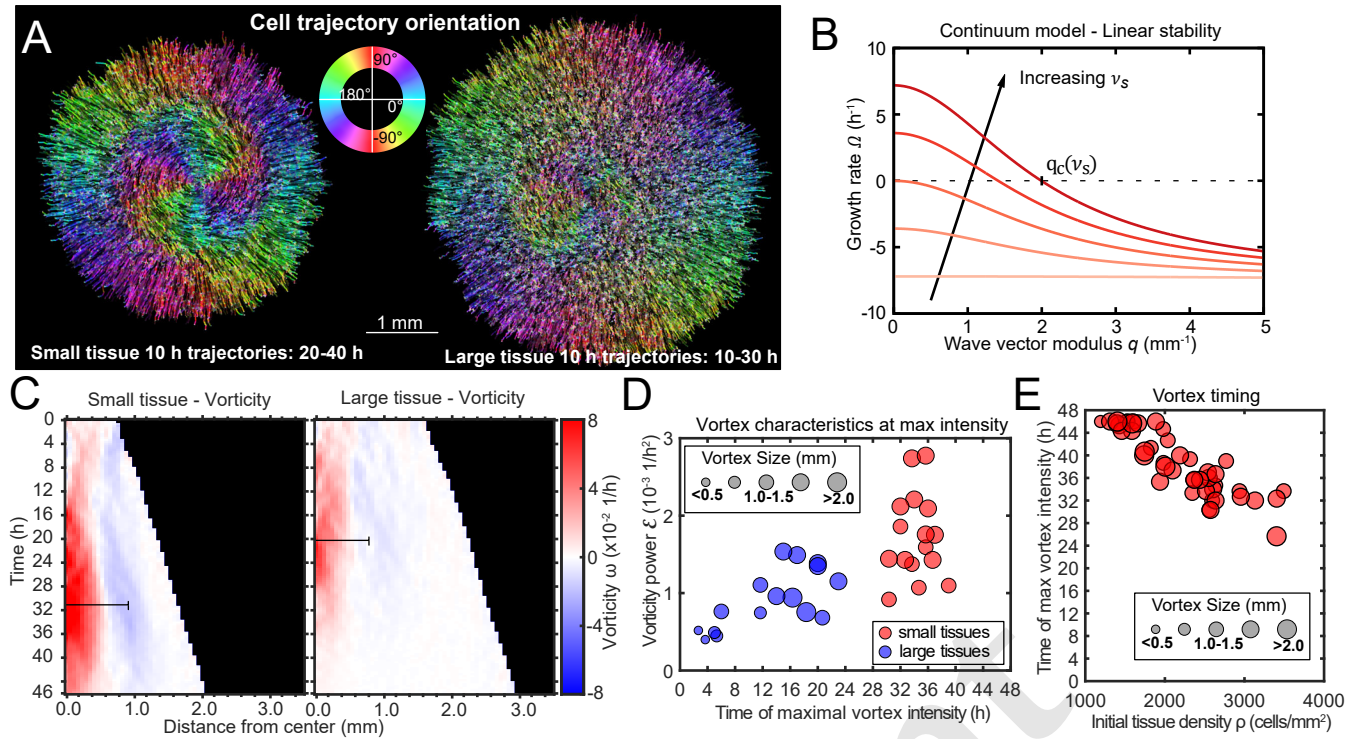

**Fig. 3.** Vortex formation in expanding tissues. (A) Vortical flows seen from 10 h traces of cell trajectories in small (left) and large (right) tissues. We color each trajectory according to its local orientation. (B) Growth rate of perturbations of wave vector modulus  $q$  around the unpolarized state of the tissue bulk, Eq. 3. Perturbations with wavelength longer than  $2\pi/q_c$  grow ( $\Omega > 0$ ), leading to large-scale spontaneous flows in the tissue bulk. We show curves for the following values of the polarity-velocity coupling parameter:  $v_s = 0, 1, 2, 3, 4$  mm<sup>-1</sup>. For the remaining parameters, we took  $T_a = 100$  Pa/ $\mu$ m,  $\xi = 100$  Pa·s/ $\mu$ m<sup>2</sup>,  $\eta = 25$  MPa·s,  $\gamma = 10$  kPa·s,  $a = 20$  Pa,  $K = 10$  nN, as estimated in Ref. (12). (C) Average kymographs of vorticity show that the vortex in small tissues appears in the center and expands to  $>1$  mm ( $n = 16$ ), while vorticity in large tissues is generally weaker except during the early stages of tissue expansion ( $n = 16$ ). The black bars indicate a characteristic vortex size. (D) Characteristic size (marker size), time (horizontal axis), and intensity (vertical axis) of each tissue's maximal vortex intensity. (E) For small tissues, the time of maximal vortex intensity correlates negatively with the initial cell density.

individual cell motion and colored cell trajectories according to their orientation (40) for a representative small and large tissue vortex (see Fig. 3A and SI Supplementary Methods). We plotted trajectories for the time periods that the vortex was most apparent, which was 20-40 h in the small tissue (Fig. 3A, left) and 10-30 h in the large tissue (Fig. 3A, right). During the vortex period in small tissues, cell trajectories are primarily radial in the boundary zone, but mainly tangential in the entire central zone (Fig. 3A left, see SI Appendix, Fig. S3 for vortex trajectory quantification).

To understand the emergence of the vortices, we build on a continuum physical model of tissue spreading that describes the cell monolayer as a two-dimensional compressible active polar fluid (12, 37, 41). Consistent with our velocity measurements (Fig. 2C), we assume that cells at the edge zone are radially polarized and motile, whereas cells in the bulk of the tissue are unpolarized and non-motile. We describe cell polarization at a coarse-grained level via a polarity field  $\mathbf{p}$  that obeys the following dynamics (4):

$$\partial_t \mathbf{p} = \frac{\mathbf{h}}{\gamma} + v_s \mathbf{v}. \quad (1)$$

Here,  $\gamma$  is the rotational viscosity that damps polarity changes. Respectively,  $\mathbf{h} = -a\mathbf{p} + K\nabla^2 \mathbf{p}$  is the so-called molecular field that governs polarity relaxation: the first term drives the polarity to zero, and the second term opposes spatial variation of the polarity field. As a result of these terms,

the radial polarity at the tissue edge decays over a length scale  $L_c = \sqrt{K/a}$  into the tissue bulk.

With respect to previous models of tissue spreading, we add the last term in Eq. 1, which couples the polarity to the tissue velocity field  $\mathbf{v}$ . This coupling is a generic property of active polar fluids interacting with a substrate (42–45). Previous works in agent-based models showed that similar polarity-velocity alignment interactions (4) can lead to waves (14), flocking transitions (46–50), and vortical flows (51–55) in small, confined, and polarized tissues. Here, using a continuum model, we propose that cell polarity not only aligns with but is also generated by tissue flow, and we ask whether this polarity-velocity coupling can lead to large-scale spontaneous flows in the unpolarized bulk of unconfined tissues.

To determine the flow field  $\mathbf{v}$ , we impose a balance between internal viscous stresses in the tissue, with viscosity  $\eta$ , and external cell-substrate forces, including viscous friction with coefficient  $\xi$ , active traction forces with coefficient  $T_a$ , and the cell-substrate forces associated with the polarity-velocity coupling  $v_s$ :

$$\eta \nabla^2 \mathbf{v} = \xi \mathbf{v} - T_a \mathbf{p} - v_s \mathbf{h}. \quad (2)$$

This force balance predicts that even if cell polarity, and hence active traction forces, are localized to a narrow boundary layer of width  $L_c \sim 50$   $\mu$ m (12, 41), cell flow can penetrate a length  $\sim \lambda = \sqrt{\eta/\xi}$  into the tissue. Based on our measurements (Fig. 2D), we estimate  $\lambda \sim 0.5 - 1$  mm.

A linear stability analysis of Eqs. 1 and 2 shows that perturbations of wave number  $q$  around the quiescent ( $\mathbf{v} = 0$ ) and unpolarized ( $\mathbf{p} = 0$ ) state grow with a rate

$$\Omega(q) = -\frac{a}{\gamma}(1 + L_c^2 q^2) + \frac{T_a \nu_s - a \nu_s^2(1 + L_c^2 q^2)}{\xi(1 + \lambda^2 q^2)}. \quad (3)$$

This result shows that, if  $T_a \nu_s > a(\xi/\gamma + \nu_s^2)$ , the unpolarized state of an active polar fluid described by Eqs. 1 and 2 is unstable ( $\Omega > 0$ ) to perturbations of wavelength longer than a critical value  $2\pi/q_c$  given by  $\Omega(q_c) = 0$  (Fig. 3B). This analysis suggests that, for tissues larger than this critical value  $\sim 2\pi/q_c$ , the quiescent tissue bulk becomes unstable and starts to flow spontaneously at large scales, consistent with the emergence of large-scale vortices. The mechanism of this instability is the positive feedback between flow-induced cell polarization and the flows due to migration of polarized cells. The fact that a critical size of the order of millimeters is required for this long-wavelength instability might explain why large-scale vortices have not been observed in previous studies, which considered smaller tissues.

**Vortex kinematics.** To quantify the kinematics of the large-scale vortical flows, we obtained the vorticity field  $\omega(\mathbf{r}, t) = \nabla \times \mathbf{v}(\mathbf{r}, t)$ . Before averaging over tissues, we took the dominant direction of rotation of each tissue to correspond to positive vorticity. This direction was counterclockwise in 51.5% of tissues and clockwise in 49.5% of tissues, with a sample size of 68. With this convention, the vortex core always has positive vorticity. Accordingly, the outer region of the vortex exhibits negative vorticity (Fig. 3C), which corresponds to the counter-rotation that occurs when the central vortical flow transitions to the outer radial flow (Fig. 3A, left). We define a characteristic vortex radius as the radial position of the center of the negative-vorticity region, which is  $\sim 1$  mm at 36 h in small tissues (Fig. 3C, black bars).

To analyze vortex dynamics across different tissues with varying vortex positioning, and to quantitatively capture the onset and strength of vortices, we calculated the enstrophy spectrum  $\mathcal{E}(q, t) = |\tilde{\omega}(\mathbf{q}, t)|^2$ , where  $\tilde{\omega}(\mathbf{q}, t) = \int (d\mathbf{r}/A) \omega(\mathbf{r}, t) e^{i\mathbf{q} \cdot \mathbf{r}}$  are the spatial Fourier components of the vorticity field  $\omega(\mathbf{r}, t)$  (56). The enstrophy spectrum is the power spectral density of the vorticity field as a function of the wave-vector modulus  $q$ , and therefore provides a measure of the vortex intensity at a length scale  $2\pi/q$ . The kymographs of the enstrophy spectrum show that most of the vortex's intensity is found at a characteristic length scale of  $\sim 1$  mm (SI Appendix, Fig. S4).

For each tissue we characterized the maximal vortex strength by the maximum value of  $\mathcal{E}(q, t)$  as well as its associated wavelength  $2\pi/q$  and time of occurrence. We represented these three quantities on a scatter plot, which shows that vortices in small tissues have generally higher intensity than those in large tissues (Fig. 3D). Vortices in small tissues are also larger relative to tissue size, since the absolute size of vortices in small and large tissues is similar (Fig. 3D). Furthermore, vortex strength peaks several hours later in small tissues than in large tissues (Fig. 3D). We hypothesized that

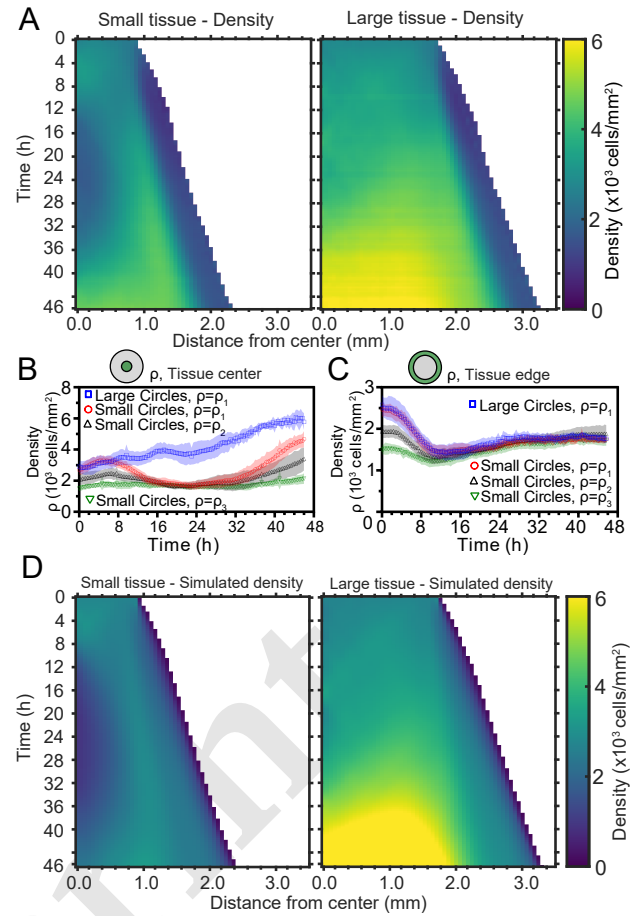

**Fig. 4. Spatiotemporal dynamics of cell density during epithelial expansion** (A) Averaged kymographs of cell density for small (left,  $n=11$ ) and large (right,  $n=9$ ) tissues. Small tissues develop a central low-density region that persists more than 20 h. (B) Cell density,  $\rho$ , at the center of large tissues increases gradually, while cell density at the center of small tissues has non-monotonic evolution. (C) For different initial tissue sizes and densities, the evolution of the cell density,  $\rho$ , at the boundary zone converges to similar values at about 12 h, which coincides with the end of the overshoot of edge radial velocity in Fig. 1D. Center and boundary zones are defined as in Fig. 2B. (D) Simulated evolution of cell densities obtained from the numerical solution of the continuity equation using the measured radial velocity  $v_r(r, t)$  and a uniform and constant cell proliferation rate corresponding to a 16 h cell doubling time. In (B,C) the initial cell density ranges  $\rho_1$ ,  $\rho_2$ , and  $\rho_3$  are the same as in Fig. 1D.

this difference is due to large tissues featuring a faster density increase than small tissues (Fig. 1C). To test this hypothesis, we varied the initial cell density of small tissues and observed that the initial cell density correlates negatively with the time of maximal vortex strength (Fig. 3E, SI Appendix, Fig. S4). These results prompted us to examine spatiotemporal cell density evolution.

**Spatiotemporal dynamics of cell density.** Given that cell density appears to affect vortex formation and is known to control contact inhibition of locomotion and proliferation (57), we explored the spatiotemporal evolution of cell density. Constructing average kymographs in the same way as for speed, radial velocity, and vorticity, we observe that the vortex region in the center of small tissues is accompanied by an unexpected local density minimum (Fig. 4A). Strikingly, snapshots of small and large tissues reveal that large-scale

vortices nucleate in low-density regions, regardless of location within the tissue (SI Appendix, Fig. S5). However, given that vortices in large tissues are often off-centered, the low-density region does not appear in their average kymograph of cell density (Fig. 4A).

To investigate the effects of initial conditions, we tracked the density evolution of the center and boundary zones across tissues with different starting densities and sizes, grouping initial densities into 3 ranges as before (Fig. 4B and C). As with the average density in Fig. 1C, the density monotonically increases in large tissues centers but is non-monotonic in small tissues. Notably, the cell density at the center of small tissues of different initial cell densities reach a common minimum during the 16-32 h time period (Fig. 4B), which includes the vortex onset time. At the boundary zone, the long-time evolution of the cell density is independent of initial tissue size and density (Fig. 4C). This common long-time evolution is reached at about 12 hours (Fig. 4C), which coincides with the time at which the edge radial velocity stabilizes upon the overshoot (Fig. 1D).

To understand the unexpected transient density decrease at the center of small tissues, we sought to explain it as the result of combined advective transport based on the measured radial flow fields  $\mathbf{v}_r(\mathbf{r}, t)$  and homogeneous cell proliferation at a rate  $k(\mathbf{r}, t) = k_0$  throughout the tissue. To test this hypothesis, we solved the continuity equation for the cell density field  $\rho(\mathbf{r}, t)$ ,

$$\frac{\partial \rho}{\partial t} = -\nabla \cdot (\rho \mathbf{v}) + k_0 \rho, \quad (4)$$

using the average radial velocity profiles  $v_r(r, t)$  measured by PIV (Fig. 2D), and a proliferation rate  $k_0 = 1.04 \text{ h}^{-1}$ , which corresponds to a cell doubling time of 16 h (SI Appendix, Supplementary Materials and Methods). This minimal model recapitulates the major features of the evolving density profiles for both small and large tissues (compare Fig. 4D with Fig. 4A). Therefore, the unexpected formation of a central low-density region results from the combination of outward tissue flow and proliferation within the colony. However, further research is required to determine the biophysical origin of the non-monotonic density evolution. Moreover, having assumed a density-independent proliferation rate, our model predicts a cell density in the center of large tissues higher than the one measured at the end of the experiment, and it does not quantitatively reproduce the cell density profiles at the edge regions. These discrepancies suggest that more complex cell proliferation behavior is required to fully recapitulate the density dynamics in expanding cell monolayers.

**Spatiotemporal dynamics of cell cycle.** To better understand how tissue expansion affects cell proliferation, we analyzed the spatiotemporal dynamics of cell-cycle state. Our cells stably express the FUCCI markers, meaning that cells in the G0-G1-S phase of the cell cycle (referred to here as G1) fluoresce in red (shown as magenta), and cells in the S-G2-M phase of the cell cycle (referred to here as G2) fluoresce in green (34). Additionally, immediately-post-mitotic cells do not fluoresce and appear dark. Small and large tissues are

initially well mixed with green and magenta cells, confirming that cells are actively cycling throughout the tissue at the time of stencil removal (SI Appendix, Fig. S6). During tissue expansion, spatiotemporal patterns of cell-cycling behavior emerge (Fig. 5A, Movie S6).

To quantitatively investigate these cell-cycle patterns, we obtained the local fractions of G1, G2, and post-mitotic cells by evaluating cell cycle state for each cell nucleus (SI Materials and Methods). We then overlaid kymographs of the G1 and G2 cell-cycle-state fractions (Fig. 5B) and plotted the time evolution of G1, G2, and post-mitotic fractions together (Fig. 5C, D). Immediately after stencil removal, we observe a cell division pulse in all tissues, which manifests in a decrease in G2 and increase in post-mitotic fraction (Fig. 5C, D). After about 12 h of tissue expansion, the boundary region becomes primarily populated by rapidly-cycling cells (Fig. 5B, C), which results in a predominance of cells in this region that either have recently divided (post-mitotic, black) or are likely to divide soon (G2, green). The high numbers of post-mitotic cells indicate that cells in G1 rapidly proceed to mitosis.

In the central region of small tissues (Fig. 5B left, D left), we observe cell-cycling dynamics similar to the boundary region. Thus, in the tissue-spanning vortex of small tissues, cells are also rapidly cycling. The fraction of cells in G1 only starts to increase at  $\sim 40$  h (Fig. 5D left), coinciding with the weakening of the vortex (Fig. 3C left). In contrast, the center zone of large tissues undergoes strong cell-cycle arrest at the G1-G2 transition at about 30 h, also coinciding with the weakening of the vortex in large tissues (Fig. 5B right, D right). Cells already past G1 at this time continue to division and re-enter G1, evidenced by the steady increase in local fraction of G1 accompanied by a steady decrease in G2 after 30 h. Similar cell-cycle arrests were previously reported both in growing epithelia (35) and in spreading 3D cell aggregates (31). Before the onset of cell-cycle arrest, the center of large tissues exhibits large-scale coordinated cell-cycling dynamics in the form of anti-phase oscillations, with peaks in G2 fraction accompanied by troughs in G1 fraction (Fig. 5B right, D right).

Finally, we sought to link cell-cycle dynamics to the kinematics of tissue expansion by studying correlations between local measurements of cell cycle, cell speed, and cell density (Fig. 5E). Here, each point represents one PIV window, with color indicating its average cell-cycle state. As expected, cell speed is negatively correlated with cell density. Further, in large tissues, the cell-cycle state transitions from G1-dominated to G2-dominated when cell density increases above  $\sim 5000$  cells/mm<sup>2</sup> and cell speed falls below  $\sim 12 \text{ } \mu\text{m/h}$  (Fig. 5E right). In this regime, the decrease of cell speed with increasing cell density bears similarities to previously-reported glass transitions and contact inhibition of locomotion (58–60). Small tissues, by contrast, lack the G1-dominated, slow, high-density cell population (Fig. 5E, left) found in the center of large tissues. Taken together, our findings emphasize that cell cycling, cell flow, and cell density patterns are inextricably linked and depend on the initial size of an expanding tissue.



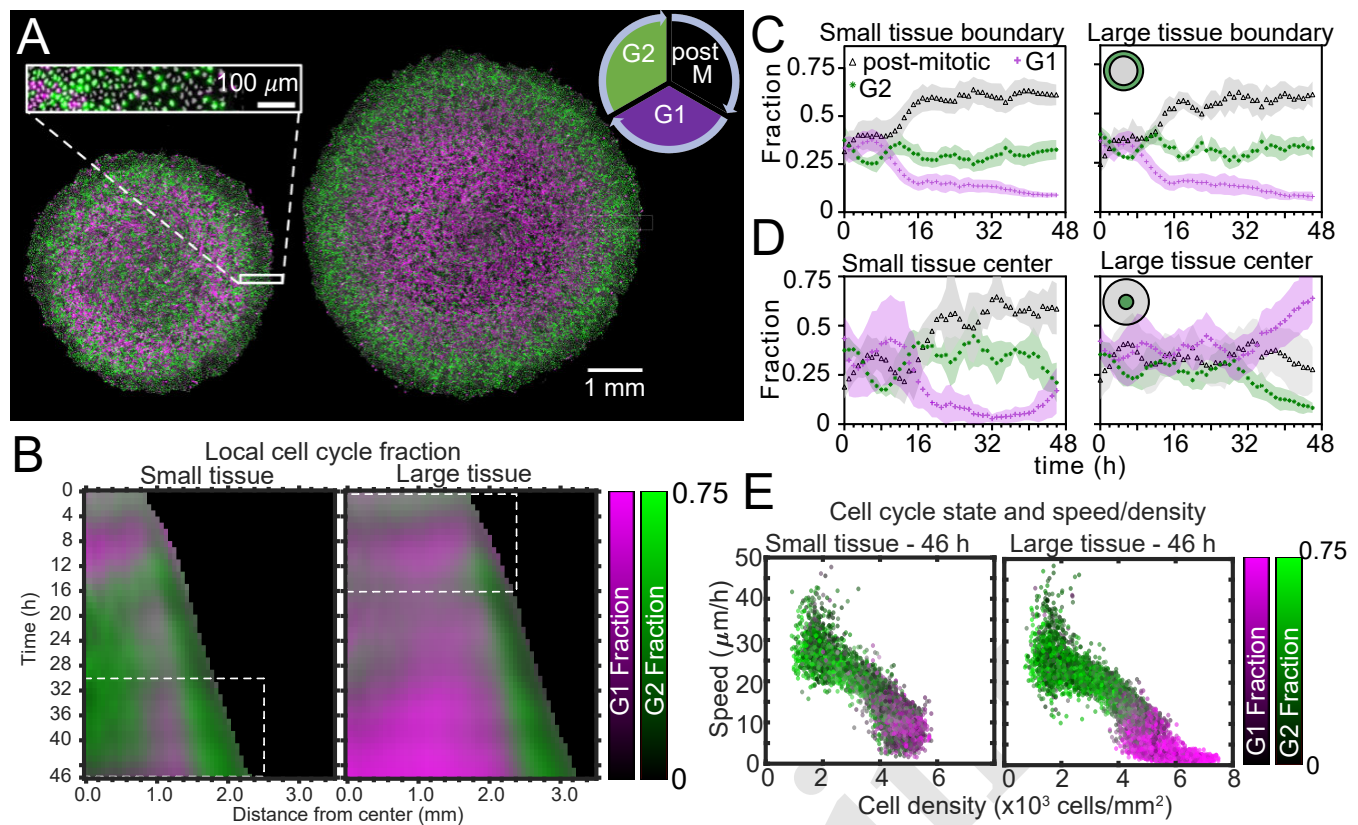

**Fig. 5.** Coordinated spatiotemporal cell-cycle dynamics. Transition from the G1 (magenta) to the G2 (green) phase of the cell cycle corresponds to DNA replication (during S phase). Subsequently, a cell proceeds to mitosis (M phase, dark), and eventually back to the G1 phase upon cell division. (A) Fluorescence images of the Fucci marker of cell-cycle state at the end of the experiment (46 h) of representative small and large tissues overlaid with nuclei positions (gray). The boundary zone of both tissues has more cells in the G2 than in the G1 phase, along with a substantial proportion of dark cells (inset). Scale bars 1 mm. (B) Average kymographs (small,  $n=5$ ; large,  $n=11$ ) of cell-cycle-state fraction. In small tissues, a G1-dominated transition zone, which appears as a vertical magenta streak from 16 h onward, is interposed between G2-dominated center and edge zones. While the size of small tissues from 30 to 46 h matches that of large tissues from 0 to 16 h (dashed boxes), cell-cycle states between these times are clearly distinct. (C) Fraction of cell-cycle states in the boundary zone. (D) Fraction of cell-cycle states in the center zone. Center and boundary zones are defined as in Fig. 2. (E) Scatter plot of density and speed, with color indicating the fraction of cells at G1 and G2, corresponding to each PIV pixel of the final timepoint of a representative small (left) and large (right) tissue.

## Discussion

We began this study by asking how changes in initial size affect the long-term expansion and growth of millimeter-scale epithelia. By means of high spatiotemporal resolution imaging and precisely controlled initial conditions, our assays systematically dissected tissue expansion and growth from the overall boundary kinematics (Fig. 1) to the internal flow patterns (Figs. 2, 3, 4) and cell-cycle dynamics (Fig. 5). While we demonstrated that ‘small’ tissues increase in area relatively much faster than do ‘large’ tissues, our data suggest a surprising and stark decoupling of the outer and inner regions of an expanding epithelium. Notably, the behaviors of the edge zones are largely independent of tissue size, cell density, and history, while interior dynamics depend strongly on these factors.

Unexpectedly, the overall tissue growth and expansion dynamics (Fig. 1) could be attributed to one dominant feature: these epithelia expanded at the same edge speed regardless of initial tissue size, shape, and cell density. As a result of this robust edge motion, the areal expansion rate of the tissue is dictated by its perimeter-to-area ratio. To further emphasize the decoupling of the boundary and internal dynamics of epithelia, consider that the key findings in Fig. 1 neither predict

nor depend upon the radically different internal dynamics we observed within ‘small’ and ‘large’ tissues. For instance, despite the roiling vortices occupying large portions of ‘small’ tissues and the pronounced, large-scale contact inhibition of ‘large’ tissues—two antithetical phenomena—no hints of these behaviors can be detected in the motion of the boundary.

Interestingly, the type and timing of internal dynamics are dictated not by the current size but by the expansion history of a given tissue. For instance, while a small tissue eventually expands to reach the initial size of a large tissue, it exhibits different internal dynamics from the large tissue at this size. This difference in internal dynamics is easiest to observe in spatiotemporal evolution of cell cycle (Fig. 5B dashed boxes); the small tissue footprint from 30–46 h closely matches the large tissue footprint from 0–16 h, but the cell cycle distribution during these time periods bears almost no similarities. This of course applies to other important bulk properties of the tissue, as cell cycle is tightly linked to cell speeds and density (Fig. 5E). While edge dynamics are stereotyped and conserved across different sizes, our findings suggest that initial tissue size impacts the bulk dynamics by altering the constraints under which the tissue grows. We expect that tissues with sizes between our two choices would

exhibit similar edge dynamics and internal patterns that cross over between our small and large tissues.

The vortices are a particularly striking example of such size- and history-dependent internal patterns. Our active fluid model suggests that the vortices emerge from a dynamical instability of the tissue bulk, which occurs when the tissue reaches a critical size. Thus, whereas the instability itself is a bulk phenomenon independent of the tissue edge, edge-driven expansion allows small tissues to reach the critical size that triggers the instability. In addition, our data suggest a strong correlation between vortex formation and the development of non-monotonic density profiles. Not only small tissues exhibited co-occurrence of vortices with density decreases in the tissue center, but also off-center vortices in large tissues were always preceded by a density decrease at the vortex core (SI Appendix, Fig. S5). These findings should foster the development of more detailed models of tissue vortices to understand their relationship to the cell density field. The pronounced decoupling between boundary and internal dynamics in epithelia confers stability to the overall expansion of the tissue, making it robust to a wide range of internal perturbations. From the perspective of collective behavior, we speculate that such robust boundary dynamics may be beneficial in a tissue whose teleology is to continuously expand from its free edges to sheath organ surfaces. Further, the ability to accurately predict epithelial expansion with a single parameter, the edge speed, will have practical uses in experimental design and tissue-engineering applications. Finally, given that many of the phenomena presented here only occurred due to the millimetric scale of our unconfined tissues and the long duration of the experiments, our results showcase the value of pushing the boundaries of large-scale, long-term studies on freely-expanding tissues.

## Materials and Methods

**Cell culture.** All experiments were performed with MDCK-II cells expressing the FUCCI cell-cycle marker system (35). We cultured cells in customized media consisting of low-glucose (1 g/L) DMEM with phenol red (Gibco, USA), 1 g/L sodium bicarbonate, 1% streptomycin/penicillin, and 10% FBS (Atlanta Biological, USA). Cells were maintained at 37°C and 5% CO<sub>2</sub> in humidified air.

**Tissue patterning.** We coated tissue-culture plastic dishes (BD Falcon, USA) with type-IV collagen (MilliporeSigma, USA) by incubating 150  $\mu$ L of 50  $\mu$ g/mL collagen on the dish under a glass coverslip for 30 minutes at 37°C, washing 3 times with deionized distilled water (DI), and allowing the dish to air-dry. We then fabricated silicone stencils with cutouts of desired shape and size and transferred the stencils to the collagen coated surface of the dishes. Stencils were cut from 250  $\mu$ m thick silicone (Bisco HT-6240, Stockwell Elastomers) using a Silhouette Cameo vinyl cutter (Silhouette, USA). We then seeded the individual stencils with cells suspended in media at 1000 cells/mL. Suspended cells were concentrated at  $\sim 2.25 \times 10^6$  cells/mL and pipetted cells into the stencils at the appropriate volume. Care was taken not

to disturb the collagen coating with the pipette tip. To allow attachment of cells to the collagen matrix, we incubated the cells in the stencils for 30 minutes in a humidified chamber before flooding the dish with media. We then incubated the cells for an additional 18 hours to allow the cells to form monolayers in the stencils, after which the stencils were removed with tweezers. Imaging began 30 minutes after stencil removal. Media without phenol red was used throughout seeding and imaging to reduce background signal during fluorescence imaging.

**Live-cell Time-lapse Imaging.** All imaging was performed with a 4X phase contrast objective on an automated, inverted Nikon Ti2 with environmental control (37°C and humidified 5% CO<sub>2</sub>) using NIS Elements software and a Nikon Qi2 CMOS camera. Phase contrast images were captured every 20 minutes, while RFP/GFP channels were captured every 60 minutes at 25% lamp power (Sola SE, Lumencor, USA) and 500 ms exposure time. No phototoxicity was observed under these conditions for up to 48 hrs. Final images were composited from 4x4 montages of each dish using NIS Elements.

**Tissue edge radial velocity.** Tissues were segmented to make binary masks using a custom MATLAB (Mathworks) script. Tissue edge radial velocity was measured from the binary masks within more than 200 discrete sectors of the tissue; the edge radial velocity of all sectors were averaged to arrive at the tissue average edge radial velocity. Radial velocity at each sector was calculated for each timepoint as the rate of change of the average extent of the boundary pixels of the sector, utilized a rolling average of 3 timepoints (1 h) to account for capture phase offsets resulting from capturing phase and fluorescence images at different frequencies. Sectors originated from the center of each tissue at the initial timepoint and were  $\sim 20 \mu$ m wide at the edge of the tissue at the starting point.

**Cell counts.** The FUCCI system contains a period after M-phase where cells go dark, making FUCCI unreliable for cell counting. Instead, we developed and trained a convolutional neural network to reproduce nuclei from 4X phase contrast images. The output of this neural network was then segmented in ImageJ to determine nuclei footprints and centroids.

**Tissue PIV and density measurements.** Tissue velocity vector fields were calculated from 2x2 resized phase contrast image sequences using the free MATLAB package PIVLab (61) with the FFT window deformation algorithm. We used a 1st pass window size of 64x64 pixels and second pass of 32x32 pixels, with 50% pixel overlaps. This resulted in a 115x115  $\mu$ m window. Local density was also calculated for each PIV window by counting the number of approximate nucleus centroids in that window. Data from PIV was smoothed in time with a moving average of 3 time points centered at each timepoint as before.



**Average kymographs.** First, we constructed kymographs for individual tissues using distance from the tissue center as the spatial index for each measurement window corresponding to a kymograph pixel. We did not plot kymograph pixels for which more than 95% of the measurements at that distance were beyond the tissue footprint. We then averaged the individual tissue kymographs, aligning by the centers.

**Trajectory colorization.** We first generated a plot of all relevant trajectories (62) colorized randomly in grayscale using a custom MATLAB (Mathworks) script. We then used the Fiji plugin OrientationJ on this plot to colorize the resulting image according to orientation (40).

**Cell density simulation.** To test whether the observed spatiotemporal evolution of density could be explained by flow of material and simple proliferation, we solved the continuity equation for a homogenous tissue in a circular geometry with spatiotemporal evolution of radial velocity as measured from PIV:  $\frac{\partial \rho}{\partial t} = -\nabla \cdot (\mathbf{j}) + k_0 \rho$ , where the current  $\mathbf{j} = \rho \mathbf{v}_r$ . We discretized the equation in space using the finite volume method, integrating over an annulus with width equivalent to 1 PIV window ( $\sim 115 \mu\text{m}$ ). By the divergence theorem, the volume integral becomes a surface integral, and the change in cell number  $\frac{\partial N_i(t)}{\partial t}$  in each annulus is determined by the flux  $\mathbf{j}$  across the inner and outer circular boundaries located at  $i-1/2$  and  $i+1/2$  plus the introduction of cells due to proliferation:  $\frac{\partial N_i(t)}{\partial t} = 2\pi r_{i-1/2} \mathbf{j}_{i-1/2} - 2\pi r_{i+1/2} \mathbf{j}_{i+1/2} + k_0 N_i$ . For numerical stability purposes, we included a diffusion term in the current  $\mathbf{j}$ , using the smallest diffusion coefficient  $D \sim 0.22 \frac{\text{mm}^2}{\text{h}}$  that sufficiently stabilized the density field. The flux was then nothing but the contribution of current due to radial velocity as well as diffusion as demanded by Fick's first law:  $\frac{\partial N_i(t)}{\partial t} = 2\pi r_{i-1/2} (\rho \mathbf{v}_r - D \frac{\partial \rho}{\partial r})_{i-1/2} - 2\pi r_{i+1/2} (\rho \mathbf{v}_r - D \frac{\partial \rho}{\partial r})_{i+1/2} + k_0 N_i$ . Dividing by the area of each annulus, we arrive at the discretized equation for the evolution of density for each annulus:

$$\frac{\partial \rho_i(t)}{\partial t} = \frac{2r_{i-1/2} (\rho \mathbf{v}_r - D \frac{\partial \rho}{\partial r})_{i-1/2} - 2r_{i+1/2} (\rho \mathbf{v}_r - D \frac{\partial \rho}{\partial r})_{i+1/2}}{r_{i+1/2}^2 - r_{i-1/2}^2} + k_0 \rho_i \quad (5)$$

for  $i > 0$  and

$$\frac{\partial \rho_i(t)}{\partial t} = \frac{2r_{i+1/2} (\rho \mathbf{v}_r - D \frac{\partial \rho}{\partial r})_{i+1/2}}{r_{i+1/2}^2} + k_0 \rho_i \quad (6)$$

for  $i = 0$ .

We integrated this equation forward in time with the Euler method using a time step of 20 minutes to align with experimental data collection. We used initial condition  $\rho_i(0) = 2700 \frac{\text{cells}}{\text{mm}^2}$  for  $r_i < r_{\text{tissue}}$  and  $\rho_i(0) = 0$  for  $r_i > r_{\text{tissue}}$ . For comparison with experimental data, we thresholded the

kymographs of simulated density at  $100 \frac{\text{cells}}{\text{mm}^2}$ , which corresponds to much lower density than a confluent tissue.

**Cell cycle analysis.** The Fucci system consists of an RFP and GFP fused to proteins Cdt1 and Geminin, respectively (34). Cdt1 levels are high during G1 and low during the rest of the cell cycle, while Geminin levels are high during the S, G2, and M phases (34, 35). After capturing the appropriate fluorescence images, preprocessing was implemented identically for GFP and RFP channels to normalize channel histograms. To determine local cell cycle fraction, we determined the median value of RFP and GFP signal for each cell nucleus and manually selected thresholds for RFP and GFP signals separately to classify cell cycle for each cell as G0-G1-S (RFP above threshold), S-G2-M (RFP below threshold and GFP above threshold), or postmitotic (RFP and GFP below threshold). Local cell cycle fraction of each state could then be easily computed for each PIV pixel. Note that S phase (both RFP and GFP signals above threshold) did not prove to be a reliable feature for segmentation.

## Acknowledgements

D.J.C. acknowledges the National Institutes of Health R35 GM133574-01. R.A. acknowledges support from the Human Frontiers of Science Program (LT000475/2018-C).

1. Rudolf Ludwig Karl Virchow. Cellular-Pathologie. *Archiv für pathologische Anatomie und Physiologie und für klinische Medizin*, III:3–39, 1855.
2. M. Abercrombie and Joan E.M. M Heaysman. Observations on the social behaviour of cells in tissue culture. II. "Monolayering" of fibroblasts. *Experimental Cell Research*, 6(2): 293–306, 1954. ISSN 00144827. doi: 10.1016/0014-4827(54)90176-7.
3. Peter Friedl and Darren Gilmour. Collective cell migration in morphogenesis, regeneration and cancer. *Nature Reviews Molecular Cell Biology*, 10(7):445–457, 2009. ISSN 14710072. doi: 10.1038/nrm2720.
4. Ricard Alert and Xavier Trepat. Physical Models of Collective Cell Migration. *Annual Review of Condensed Matter Physics*, 11(1):77–101, 2020. ISSN 1947-5454. doi: 10.1146/annurev-conmatphys-031218-013516.
5. Vincent Hakim and Pascal Silberzan. Collective cell migration: A physics perspective. *Reports on Progress in Physics*, 80(7):076601, 2017. ISSN 00344885. doi: 10.1088/1361-6633/aa65ef.
6. M. Poujade, E. Grasland-Mongrain, A. Hertzog, J. Jouanneau, P. Chavrier, B. Ladoux, A. Buguin, and P. Silberzan. Collective migration of an epithelial monolayer in response to a model wound. *Proceedings of the National Academy of Sciences of the United States of America*, 104(41):15988–15993, 2007. ISSN 00278424. doi: 10.1073/pnas.0705062104.
7. Malcolm S. Steinberg. Differential adhesion in morphogenesis: a modern view. *Current Opinion in Genetics and Development*, 17(4):281–286, 2007. ISSN 0959437X. doi: 10.1016/j.gde.2007.05.002.
8. Christian Dahmann, Andrew C. Oates, and Michael Brand. Boundary formation and maintenance in tissue development. *Nature Reviews Genetics*, 12(1):43–55, 2011. ISSN 14710056. doi: 10.1038/nrg2902.
9. Kevin Doxzen, Sri Ram Krishna Vedula, Man Chun Leong, Hiroaki Hirata, Nir S. Gov, Alexandre J. Kabla, Benoît Ladoux, and Chwee Teck Lim. Guidance of collective cell migration by substrate geometry. *Integrative Biology (United Kingdom)*, 5(8):1026–1035, 2013. ISSN 17579708. doi: 10.1039/c3ib40054a.
10. M. Deforet, V. Hakim, H. G. Yevick, G. Duclos, and P. Silberzan. Emergence of collective modes and tri-dimensional structures from epithelial confinement. *Nature Communications*, 5(May):3747, 2014. ISSN 20411723. doi: 10.1038/ncomms4747.
11. Jacob Notbohm, Shiladitya Banerjee, Kazage J.C. C Utuje, Bomi Gweon, Hwanseok Jang, Yongdoo Park, Jennifer Shin, James P. Butler, Jeffrey J. Fredberg, and M. Cristina Marchetti. Cellular Contraction and Polarization Drive Collective Cellular Motion. *Biophysical Journal*, 110(12):2729–2738, 2016. ISSN 15420086. doi: 10.1016/j.bpj.2016.05.019.
12. Carlos Pérez-González, Ricard Alert, Carles Blanch-Mercader, Manuel Gómez-González, Tomasz Kolodziej, Elsa Bazellieres, Jaume Casademunt, and Xavier Trepat. Active wetting of epithelial tissues. *Nature Physics*, 15(1):79–88, 2019. ISSN 17452481. doi: 10.1038/s41567-018-0279-5.
13. Grégoire Peyret, Romain Mueller, Joseph D'Alessandro, Simon Begnaud, Philippe Marcq, René Marc Mège, Julia M. Yeomans, Amin Doostmohammadi, and Benoît Ladoux. Sustained Oscillations of Epithelial Cell Sheets. *Biophysical Journal*, 117(3):464–478, 2019. ISSN 15420086. doi: 10.1016/j.bpj.2019.06.013.
14. Vanni Petrolli, Magali Le Goff, Monika Tadrous, Kirsten Martens, Cédric Allier, Ondrej Mandula, Lionel Hervé, Silke Henkes, Rastko Sknepnek, Thomas Boudou, Giovanni Cappello, and Martial Bailand. Confinement-Induced Transition between Wavelike Collective Cell Migration Modes. *Physical Review Letters*, 122(16):168101, 2019. ISSN 10797114. doi: 10.1103/PhysRevLett.122.168101.

15. Thomas Lecuit and Pierre François Lenne. Cell surface mechanics and the control of cell shape, tissue patterns and morphogenesis. *Nature Reviews Molecular Cell Biology*, 8(8): 633–644, 2007. ISSN 14710072. doi: 10.1038/nrm2222.
16. Xavier Trepatt, Michael R. Wasserman, Thomas E. Angelini, Emil Millet, David A. Weitz, James P. Butler, and Jeffrey J. Fredberg. Physical forces during collective cell migration. *Nature Physics*, 5(6):426–430, 2009. ISSN 17452481. doi: 10.1038/nphys1269.
17. L. Petitjean, M. Refray, E. Grasland-Mongrain, M. Poujade, B. Ladoux, A. Buguin, and P. Silberzan. Velocity fields in a collectively migrating epithelium. *Biophysical Journal*, 98(9): 1790–1800, 2010. ISSN 15420086. doi: 10.1016/j.bpj.2010.01.030.
18. M. Refray, L. Petitjean, S. Coscoy, E. Grasland-Mongrain, F. Amblard, A. Buguin, and P. Silberzan. Orientation and polarity in collectively migrating cell structures: Statics and dynamics. *Biophysical Journal*, 100(11):2566–2575, 2011. ISSN 15420086. doi: 10.1016/j.bpj.2011.04.047.
19. Kenekukwu David Nnetu, Melanie Knorr, Dan Strehle, Mareike Zink, and Josef A. Käs. Directed persistent motion maintains sheet integrity during multi-cellular spreading and migration. *Soft Matter*, 8(26):6913–6921, 2012. ISSN 1744683X. doi: 10.1039/c2sm07208d.
20. Xavier Serra-Picamal, Vito Conte, Romaric Vincent, Ester Anon, Dhananjay T Tambe, Elsa Bazellieres, James P Butler, Jeffrey J Fredberg, and Xavier Trepatt. Mechanical waves during tissue expansion. *Nature Physics*, 8(8):628–634, 2012. ISSN 1745-2473. doi: 10.1038/nphys2355.
21. Min Zhao, Tingrui Pan, Gong Zhang, Jiandong Wu, Alex Mogilner, Zhengping Xu, Simon Liao, Guoqing Xu, Yan Zhang, Francis Lin, Wolfgang Losert, Zijie Zhu, Yaohui Sun, and Rachel M. Lee. Collective cell migration has distinct directionality and speed dynamics. *Cellular and Molecular Life Sciences*, 74(20):3841–3850, 2017. ISSN 1420-682X. doi: 10.1007/s00018-017-2553-6.
22. Marina Uroz, Sabrina Wistorf, Xavier Serra-Picamal, Vito Conte, Marta Sales-Pardo, Pere Roca-Cusachs, Roger Guimerà, and Xavier Trepatt. Regulation of cell cycle progression by cell-cell and cell-matrix forces. *Nature Cell Biology*, 20(6):646–654, 2018. ISSN 14764679. doi: 10.1038/s41556-018-0107-2.
23. Sham Tlili, Estelle Gauquelin, Brigitte Li, Olivier Cardoso, Benoît Ladoux, Hélène Delanoë Ayari, and François Graner. Collective cell migration without proliferation: Density determines cell velocity and wave velocity. *Royal Society Open Science*, 5(5):172421, 2018. ISSN 20545703. doi: 10.1098/rsos.172421.
24. Hwanseok Jang, Jacob Notbohm, Bomi Gweon, Youngbin Cho, Chan Young Park, Sun Ho Kee, Jeffrey J. Fredberg, Jennifer H. Shin, and Yongdoo Park. Homogenizing cellular tension by hepatocyte growth factor in expanding epithelial monolayer. *Scientific Reports*, 8 (April):45844, 2017. ISSN 20452322. doi: 10.1038/srep45844.
25. Claudio G. Rolli, Hidekazu Nakayama, Kazuo Yamaguchi, Joachim P. Spatz, Ralf Kemmerer, and Jun Nakanishi. Switchable adhesive substrates: Revealing geometry dependence in collective cell behavior. *Biomaterials*, 33(8):2409–2418, 2012. ISSN 01429612. doi: 10.1016/j.biomaterials.2011.12.012.
26. Sri Ram Krishna Vedula, Man Chun Leong, Tan Lei Lai, Pascal Hersen, Alexandre J. Kabla, Chwee Teck Lim, and Benoît Ladoux. Emerging modes of collective cell migration induced by geometrical constraints. *Proceedings of the National Academy of Sciences of the United States of America*, 109(32):12974–12979, 2012. ISSN 00278424. doi: 10.1073/pnas.1119313109.
27. Daniel J. Cohen, W. James Nelson, and Michel M. Maharbiz. Galvanotactic control of collective cell migration in epithelial monolayers. *Nature Materials*, 13(4):409–417, 2014. ISSN 14764660. doi: 10.1038/nmat3891.
28. Alberto Puliafito, Lars Hufnagel, Pierre Neveu, Sebastian Streichan, Alex Sigal, D. Kuchnir Fyngenson, and Boris I. Shraiman. Collective and single cell behavior in epithelial contact inhibition. *Proceedings of the National Academy of Sciences of the United States of America*, 109(3):739–744, 2012. ISSN 00278424. doi: 10.1073/pnas.1007809109.
29. M. A.C. Huergo, M. A. Pasquale, P. H. González, A. E. Bolzán, and A. J. Arvia. Dynamics and morphology characteristics of cell colonies with radially spreading growth fronts. *Physical Review E - Statistical, Nonlinear, and Soft Matter Physics*, 84(2):1–11, 2011. ISSN 15393755. doi: 10.1103/PhysRevE.84.021917.
30. Rachel M. Lee, Douglas H. Kelley, Kerstin N. Nordstrom, Nicholas T. Ouellette, and Wolfgang Losert. Quantifying stretching and rearrangement in epithelial sheet migration. *New Journal of Physics*, 15(2):025036, 2013. ISSN 13672630. doi: 10.1088/1367-2630/15/2/025036.
31. Grégory Beaune, Tomita Vasilica Stîrbat, Nada Khalifat, Olivier Cochet-Escartin, Simon Garcia, Vasily Valefievitch Gurchenkov, Michael P. Murrell, Sylvie Dufour, Damien Cuvelier, and Françoise Brochard-Wyart. How cells flow in the spreading of cellular aggregates. *Proceedings of the National Academy of Sciences of the United States of America*, 111 (22):8055–8060, 2014. ISSN 10916490. doi: 10.1073/pnas.1323788111.
32. Matthew J. Simpson, Katrina K. Treloar, Benjamin J. Binder, Parvathi Haridas, Kerry J. Manton, David I. Leavesley, D. L. Sean McElwain, and Ruth E. Baker. Quantifying the roles of cell motility and cell proliferation in a circular barrier assay. *Journal of the Royal Society Interface*, 10(82), 2013. ISSN 17425662. doi: 10.1098/rsif.2013.0007.
33. Daniel J. Cohen, Martijn Goerlich, and W. James Nelson. Epithelial self-healing is recapitulated by a 3D biomimetic E-cadherin junction. *Proceedings of the National Academy of Sciences of the United States of America*, 113(51):14698–14703, 2016. ISSN 10916490. doi: 10.1073/pnas.1612208113.
34. Asako Sakaue-Sawano, Hiroshi Kurokawa, Toshifumi Morimura, Aki Hanyu, Hiroshi Hama, Hatsuaki Osawa, Saori Kashiwagi, Kiyoko Fukami, Takaki Miyata, Hiroyuki Miyoshi, Takeshi Imamura, Masaharu Ogawa, Hisao Masai, and Atsushi Miyawaki. Visualizing Spatiotemporal Dynamics of Multicellular Cell-Cycle Progression. *Cell*, 132(3):487–498, 2008. ISSN 00928674. doi: 10.1016/j.cell.2007.12.033.
35. S. J. Streichan, C. R. Hoerner, T. Schneidit, D. Holzer, and L. Hufnagel. Spatial constraints control cell proliferation in tissues. *Proceedings of the National Academy of Sciences*, 111 (15):5586–5591, 2014. ISSN 0027-8424. doi: 10.1073/pnas.1323016111.
36. Blair W. Benham-Pyle, Joo Yong Sim, Kevin C. Hart, Beth L. Pruitt, and William James Nelson. Increasing  $\beta$ -catenin/Wnt3A activity levels drive mechanical strain-induced cell cycle progression through mitosis. *eLife*, 5(OCTOBER2016):1–28, 2016. ISSN 2050084X. doi: 10.7554/eLife.19799.
37. Ricard Alert, Carles Blanch-Mercader, and Jaume Casademunt. Active fingering instability in tissue spreading. *Physical Review Letters*, 122(8):088104, 2019. ISSN 10797114. doi: 10.1103/PhysRevLett.122.088104.
38. Thomas E. Angelini, Edouard Hannezo, Xavier Trepatt, Jeffrey J. Fredberg, and David A. Weitz. Cell migration driven by cooperative substrate deformation patterns. *Physical Review Letters*, 104(16):168104, 2010. ISSN 00319007. doi: 10.1103/PhysRevLett.104.168104.
39. Kazuhiro Aoki, Yohei Kondo, Honda Naoki, Toru Hiratsuka, Reina E. Itoh, and Michiyuki Matsuda. Propagating Wave of ERK Activation Orients Collective Cell Migration. *Developmental Cell*, 43(3):305–317.e5, 2017. ISSN 18781551. doi: 10.1016/j.devcel.2017.10.016.
40. Zsuzsanna Püspöki, Martin Storch, Daniel Sage, and Michael Unser. Transforms and operators for directional bioimage analysis: a survey. *Focus on Bio-Image Informatics*, pages 69–93, 2016. doi: 10.1007/978-3-319-28549-8.
41. C. Blanch-Mercader, R. Vincent, E. Bazellieres, X. Serra-Picamal, X. Trepatt, and J. Casademunt. Effective viscosity and dynamics of spreading epithelia: a solvable model. *Soft Matter*, 13(6):1235–1243, 2017. ISSN 1744-683X. doi: 10.1039/C6SM02188C.
42. Tommaso Brotto, Jean-Baptiste Caussin, Eric Lauga, and Denis Bartolo. Hydrodynamics of Confined Active Fluids. *Phys. Rev. Lett.*, 110(3):038101, jan 2013. doi: 10.1103/PhysRevLett.110.038101.
43. Nitin Kumar, Harsh Soni, Sriram Ramaswamy, and A K Sood. Flocking at a distance in active granular matter. *Nat. Commun.*, 5:4688, jan 2014. ISSN 2041-1723. doi: 10.1038/ncomms5688.
44. David Oriola, Ricard Alert, and Jaume Casademunt. Fluidization and Active Thinning by Molecular Kinetics in Active Gels. *Phys. Rev. Lett.*, 118(8):088002, feb 2017. ISSN 0031-9007. doi: 10.1103/PhysRevLett.118.088002.
45. Ananyo Maitra, Pragna Srivastava, M. Cristina Marchetti, Sriram Ramaswamy, and Martin Lenz. Swimmer Suspensions on Substrates: Anomalous Stability and Long-Range Order. *Phys. Rev. Lett.*, 124(2):028002, jan 2020. doi: 10.1103/PhysRevLett.124.028002.
46. B. Szabó, G. Szöllösi, B. Gönci, Zs. Jurányi, D. Selmeczi, and Tamás Vicsek. Phase transition in the collective migration of tissue cells: Experiment and model. *Phys. Rev. E*, 74(6): 061908, dec 2006. ISSN 1539-3755. doi: 10.1103/PhysRevE.74.061908.
47. Silke Henkes, Yaouen Fily, and M. Cristina Marchetti. Active jamming: Self-propelled soft particles at high density. *Phys. Rev. E*, 84(4):040301, oct 2011. ISSN 1539-3755. doi: 10.1103/PhysRevE.84.040301.
48. Markus Basan, Jens Elgeti, Edouard Hannezo, Wouter-Jan Rappel, and Herbert Levine. Alignment of cellular motility forces with tissue flow as a mechanism for efficient wound healing. *Proc. Natl. Acad. Sci. U. S. A.*, 110(7):2452–2459, feb 2013. ISSN 1091-6490. doi: 10.1073/pnas.1219937110.
49. Chiara Malinverno, Salvatore Corallino, Fabio Giavazzi, Martin Bergert, Qingsen Li, Marco Leoni, Andrea Disanza, Emanuela Frittoli, Amanda Oldani, Emanuele Martini, Tobias Lendenmann, Gianluca Defforian, Galina V. Beznoussenko, Dimos Poulikakos, Kok Haur Ong, Marina Uroz, Xavier Trepatt, Dario Parazzoli, Paolo Maiuri, Aldo Ferrari, Roberto Cerbino, and Giorgio Scita. Endocytic reawakening of motility in jammed epithelia. *Nat. Mater.*, 16(April):587–596, 2017. ISSN 1476-1122. doi: 10.1038/nmat4848.
50. Fabio Giavazzi, Matteo Paoluzzi, Marta Macchi, Dapeng Bi, Giorgio Scita, M. Lisa Manning, Roberto Cerbino, and M. Cristina Marchetti. Flocking transitions in confluent tissues. *Soft Matter*, 14(18):3471–3477, 2018. ISSN 1744-683X. doi: 10.1039/C8SM00126J.
51. Wouter-Jan Rappel, Alastair Nicol, Armand Sarkissian, Herbert Levine, and William F. Loomis. Self-organized Vortex State in Two-Dimensional Dictyostelium Dynamics. *Phys. Rev. Lett.*, 83(6):1247–1250, aug 1999. doi: 10.1103/PhysRevLett.83.1247.
52. Brian A. Camley, Yunsong Zhang, Yanxiang Zhao, Bo Li, Eshel Ben-Jacob, Herbert Levine, and W.-J. Rappel. Polarity mechanisms such as contact inhibition of locomotion regulate persistent rotational motion of mammalian cells on micropatterns. *Proc. Natl. Acad. Sci. U. S. A.*, 111(41):14770–14775, oct 2014. ISSN 0027-8424. doi: 10.1073/pnas.1414498111.
53. Bo Li and Sean X Sun. Coherent Motions in Confluent Cell Monolayer Sheets. *Biophys. J.*, 107(7):1532–1541, oct 2014. ISSN 1542-0086. doi: 10.1016/j.bpj.2014.08.006.
54. Felix J. Segerer, Florian Thüroff, Alicia Piera Alberola, Erwin Frey, and Joachim O. Rädler. Emergence and Persistence of Collective Cell Migration on Small Circular Micropatterns. *Phys. Rev. Lett.*, 114(22):228102, jun 2015. ISSN 0031-9007. doi: 10.1103/PhysRevLett.114.228102.
55. Daniel L. Barton, Silke Henkes, Cornelis J. Weijer, and Rastko Sknepnek. Active Vertex Model for cell-resolution description of epithelial tissue mechanics. *PLOS Comput. Biol.*, 13 (6):e1005569, jun 2017. doi: 10.1371/journal.pcbi.1005569.
56. Ricard Alert, Jean-François Joanny, and Jaume Casademunt. Universal scaling of active nematic turbulence. *Nat. Phys.*, pages 1–7, mar 2020. ISSN 1745-2481. doi: 10.1038/s41567-020-0854-4.
57. Simon K. Schnyder, John J. Molina, and Ryoichi Yamamoto. Control of cell colony growth by contact inhibition. *Scientific Reports*, page 6713, 2020. doi: 10.1038/s41598-020-62913-z.
58. T. E. Angelini, E. Hannezo, X. Trepatt, M. Marquez, J. J. Fredberg, and D. A. Weitz. Glass-like dynamics of collective cell migration. *Proceedings of the National Academy of Sciences*, 108(12):4714–4719, 2011. ISSN 0027-8424. doi: 10.1016/j.pnas.1010059108.
59. Juliane Zimmermann, Brian A. Camley, Wouter-Jan Rappel, and Herbert Levine. Contact inhibition of locomotion determines cell-cell and cell-Substrate forces in tissues. *Proceedings of the National Academy of Sciences of the United States of America*, 113(10):2660–2665, 2016. ISSN 10916490. doi: 10.1073/pnas.1522330113.
60. Simon Garcia, Edouard Hannezo, Jens Elgeti, Jean François Joanny, Pascal Silberzan, and Nir S. Gov. Physics of active jamming during collective cellular motion in a monolayer. *Proceedings of the National Academy of Sciences of the United States of America*, 112(50): 15314–15319, 2015. ISSN 10916490. doi: 10.1073/pnas.1510973112.
61. William Thielicke and Eize Stamhuis. PIVlab—towards user-friendly, affordable and accurate digital particle image velocimetry in MATLAB. *Journal of Open Research Software*, 2(1): e30, 2014. doi: <http://doi.org/10.5334/jors.bl>.
62. Jean Yves Tinevez, Nick Perry, Johannes Schindelin, Genevieve M. Hoopes, Gregory D. Reynolds, Emmanuel Laplantine, Sebastian Y. Bednarek, Spencer L. Shorte, and Kevin W. Eliceiri. TrackMate: An open and extensible platform for single-particle tracking. *Methods*, 115:80–90, 2017. ISSN 10959130. doi: 10.1016/j.ymeth.2016.09.016.
